# Supplementary material for: Airway clearance techniques for patients with acute exacerbations of chronic obstructive pulmonary disease: Physical therapy practice in Sweden
Source: PubMed Central journal article supplement — Chron Respir Dis. 2019 Jun 20;16:1479973119855868. doi: 10.1177/1479973119855868 (PMC6587388; doi:10.1177/1479973119855868), 2019-06-20
Supplement: Appendix_1_Part_A_Chronic_Respiratory_Disease.pdf [file Appendix_1_Part_A_Chronic_Respiratory_Disease.pdf]

## Questionnaire (Part A)

### Physiotherapy management of patients with acute exacerbation of COPD

**1. For how many years have you been practicing as a physiotherapist?**

- ☐ 0 to <5 years
- ☐ 5 to <10 years
- ☐ 10 to <15 years
- ☐ 15 to <20 years
- ☐ 20+ years

**2. For how many years have you been practicing in cardiorespiratory physiotherapy?**

- ☐ 0 to <5 years
- ☐ 5 to <10 years
- ☐ 10 to <15 years
- ☐ 15 to <20 years
- ☐ 20+ years

**3. For approximately what % of patients (on average) with AECOPD do you prescribe ACTs?**

- ☐ 0 to <20%
- ☐ 20 to <40%
- ☐ 40 to <60%
- ☐ 60 to <80%
- ☐ 80 to 100%

**4. For those patients with AECOPD who require ACTs, approximately how much time (on average) per therapy session would you devote to ACTs? Please tick one response only.**

- ☐ 0 to <5 mins
- ☐ 5 to <10 mins
- ☐ 10 to <15 mins
- ☐ 15 to <20 mins
- ☐ 20+ mins

**5. How important do you feel sputum clearance is in the overall management (not just physiotherapeutic) of patients with AECOPD?**

- ☐ Very important
- ☐ Fairly important
- ☐ Moderately important
- ☐ Fairly unimportant
- ☐ Very unimportant

## 6. How frequently do you use the following ACTs for patients with AECOPD?

Please indicate by placing a tick (✓) in the corresponding box. Please tick only one box for each ACT:

**Very often or always / Often / Sometimes / Rarely / Very rarely or never**

- Active cycle of breathing technique
- Autogenic drainage
- Deep breathing exercises
- Directed coughing
- Directed huffing (FET)
- Gravity-assisted drainage (including head down positions)
- Modified gravity-assisted drainage (excluding head down positions)
- Manual vibration
- Mechanical vibration via a device (e.g. vest)
- Oscillating PEP (device): e.g. Flutter®, Acapella®, Cornet®
- Oscillating PEP (other): e.g. bubble / bottle
- PEP (device): e.g. mask, mouthpiece / Pari
- Percussion
- Physical exercise (for airway clearance)
- Positioning (to influence regional ventilation)
- Sustained maximal inspiration (SMI)
- Other (please specify):

## 7. How effective at clearing sputum do you feel the following ACTs are for patients with AECOPD?

Please indicate by placing a tick (✓) in the corresponding box. Please tick only one box for each ACT:

**Very effective / Effective / Neutral or N/A / Ineffective / Very ineffective**

- Active cycle of breathing technique
- Autogenic drainage
- Deep breathing exercises
- Directed coughing
- Directed huffing (FET)
- Gravity-assisted drainage (including head down positions)
- Modified gravity-assisted drainage (excluding head down positions)
- Manual vibration
- Mechanical vibration via a device (e.g. vest)
- Oscillating PEP (device): e.g. Flutter®, Acapella®, Cornet®
- Oscillating PEP (other): e.g. bubble / bottle
- PEP (device): e.g. mask, mouthpiece / Pari
- Percussion
- Physical exercise (for airway clearance)
- Positioning (to influence regional ventilation)
- Sustained maximal inspiration (SMI)
- Other (please specify):

## 8. How easy is it for patients with AECOPD to master the following ACTs?

Please indicate by placing a tick (!) in the corresponding box. Please tick only one box for each ACT:

**Very easy / Easy Neutral or N/A / Difficult / Very difficult**

- Active cycle of breathing technique
- Autogenic drainage
- Deep breathing exercises
- Directed coughing
- Directed huffing (FET)
- Gravity-assisted drainage (including head down positions)
- Modified gravity-assisted drainage (excluding head down positions)
- Mechanical vibration via a device (e.g. vest)
- Oscillating PEP (device): e.g. Flutter®, Acapella®, Cornet®
- Oscillating PEP (other): e.g. bubble / bottle
- PEP (device): e.g. mask, mouthpiece / Pari
- Physical exercise (for airway clearance)
- Positioning (to influence regional ventilation)

- Sustained maximal inspiration (SMI)
- Other (please specify):

### 9. What do you consider to be important indications for ACTs in patients with AECOPD?

You may tick (✓) multiple responses if required.

- ( ) A recent change in sputum characteristics (e.g. volume, colour, consistency)
- ( ) Anyone with a productive cough (e.g. is expectorating or swallowing)
- ( ) Clinical signs suggestive of an infectious exacerbation (e.g. purulent sputum, febrile, raised white cell count etc)
- ( ) Evidence of difficulty managing secretions (e.g. ineffective cough, audible gurgling, crackles due to secretions)
- ( ) Patients in need of education (e.g. little insight into how best to clear sputum)
- ( ) Patients who produce >30mls sputum/day (e.g. >1 shot-glass)
- ( ) Patients who usually perform ACTs as part of the management of their condition
- ( ) Presence of secretions (whether expectorating or not)
- ( ) Other (please specify):

### 10. What are your primary aims of using ACTs with patients with AECOPD?

You may tick multiple responses.

- ( ) To alter/improve pulmonary function (e.g. FEV1, VC, FRC)
- ( ) To clear sputum
- ( ) To educate the patient
- ( ) To enhance recovery from AECOPD
- ( ) To improve oxygen saturation
- ( ) To improve quality of life
- ( ) To increase exercise tolerance
- ( ) To increase ventilation
- ( ) To prevent future readmissions
- ( ) To prevent the development of pulmonary complications (e.g. pneumonia)
- ( ) To promote independence
- ( ) To reduce dyspnoea
- ( ) To reduce inpatient length of stay
- ( ) To reduce mortality
- ( ) To reduce the need for antibiotics
- ( ) To reduce the frequency of coughing

### 11. Do you prefer to use one ACT over others?

- ( ) Yes If yes, please indicate your 1 (one) most preferred ACT:.....
- ( ) No

**12. How do you decide which ACT to use for patients with AECOPD?** You may tick multiple responses.

- ☐ Access to resources/equipment
- ☐ Choose the one that is likely to be easiest to master
- ☐ Consider what has been done before
- ☐ Cost effectiveness
- ☐ Degree of dyspnoea or work of breathing
- ☐ Departmental/ward-based protocols
- ☐ Presence/absence of dynamic airway collapse / 'floppy' airways
- ☐ Presence/absence of dynamic hyperinflation
- ☐ Presence/absence of precautions/contraindications
- ☐ The highest level of evidence supporting a particular ACT
- ☐ The patient's preference for a particular ACT
- ☐ The physiotherapist's experience using a technique
- ☐ The physiotherapist's preference for using a particular ACT
- ☐ Time effectiveness (including time to prepare, find and clean equipment)

**13. When do you advise patients with AECOPD to cease performing ACTs?** You may tick multiple responses.

- ☐ When sputum characteristics (e.g. volume, colour, consistency) have returned to baseline
- ☐ When the patient feels their chest condition overall is back to 'usual' (irrespective of sputum characteristics)
- ☐ Whenever the patient wants to stop
- ☐ When there is no evidence of sputum (e.g. dry cough)
- ☐ On discharge from hospital
- ☐ After discharge (e.g. advice to continue after discharge)
- ☐ Never – they should perform daily airway clearance irrespective of clinical status
- ☐ Other (please specify):.....

**14. What is your understanding of the scientific evidence for the effectiveness of ACTs for patients with AECOPD?**

- ☐ There is strong evidence supporting the usefulness of ACTs during AECOPD
- ☐ There is weak evidence supporting the usefulness of ACTs during AECOPD
- ☐ The evidence is conflicting, inconclusive or non-existent to support or refute the usefulness of ACTs during AECOPD
- ☐ There is weak evidence refuting the usefulness of ACTs during AECOPD
- ☐ There is strong evidence refuting the usefulness of ACTs during AECOPD
- ☐ I am unsure what the current evidence is for ACTs during AECOPD
